# Supplementary material for: Refinement of the rat acetylcholine receptor-specific passive transfer Myasthenia Gravis model: the advantage of subcutaneous injections. A guidelines’ update
Source: Research Square preprint supplement (doi:10.21203/rs.3.rs-6113927/v1), 2025-06-04
Supplement: Supplementary file 1 [file dbf3c935a232c7c8a813b44a.docx]

Supplementary material and methods

***
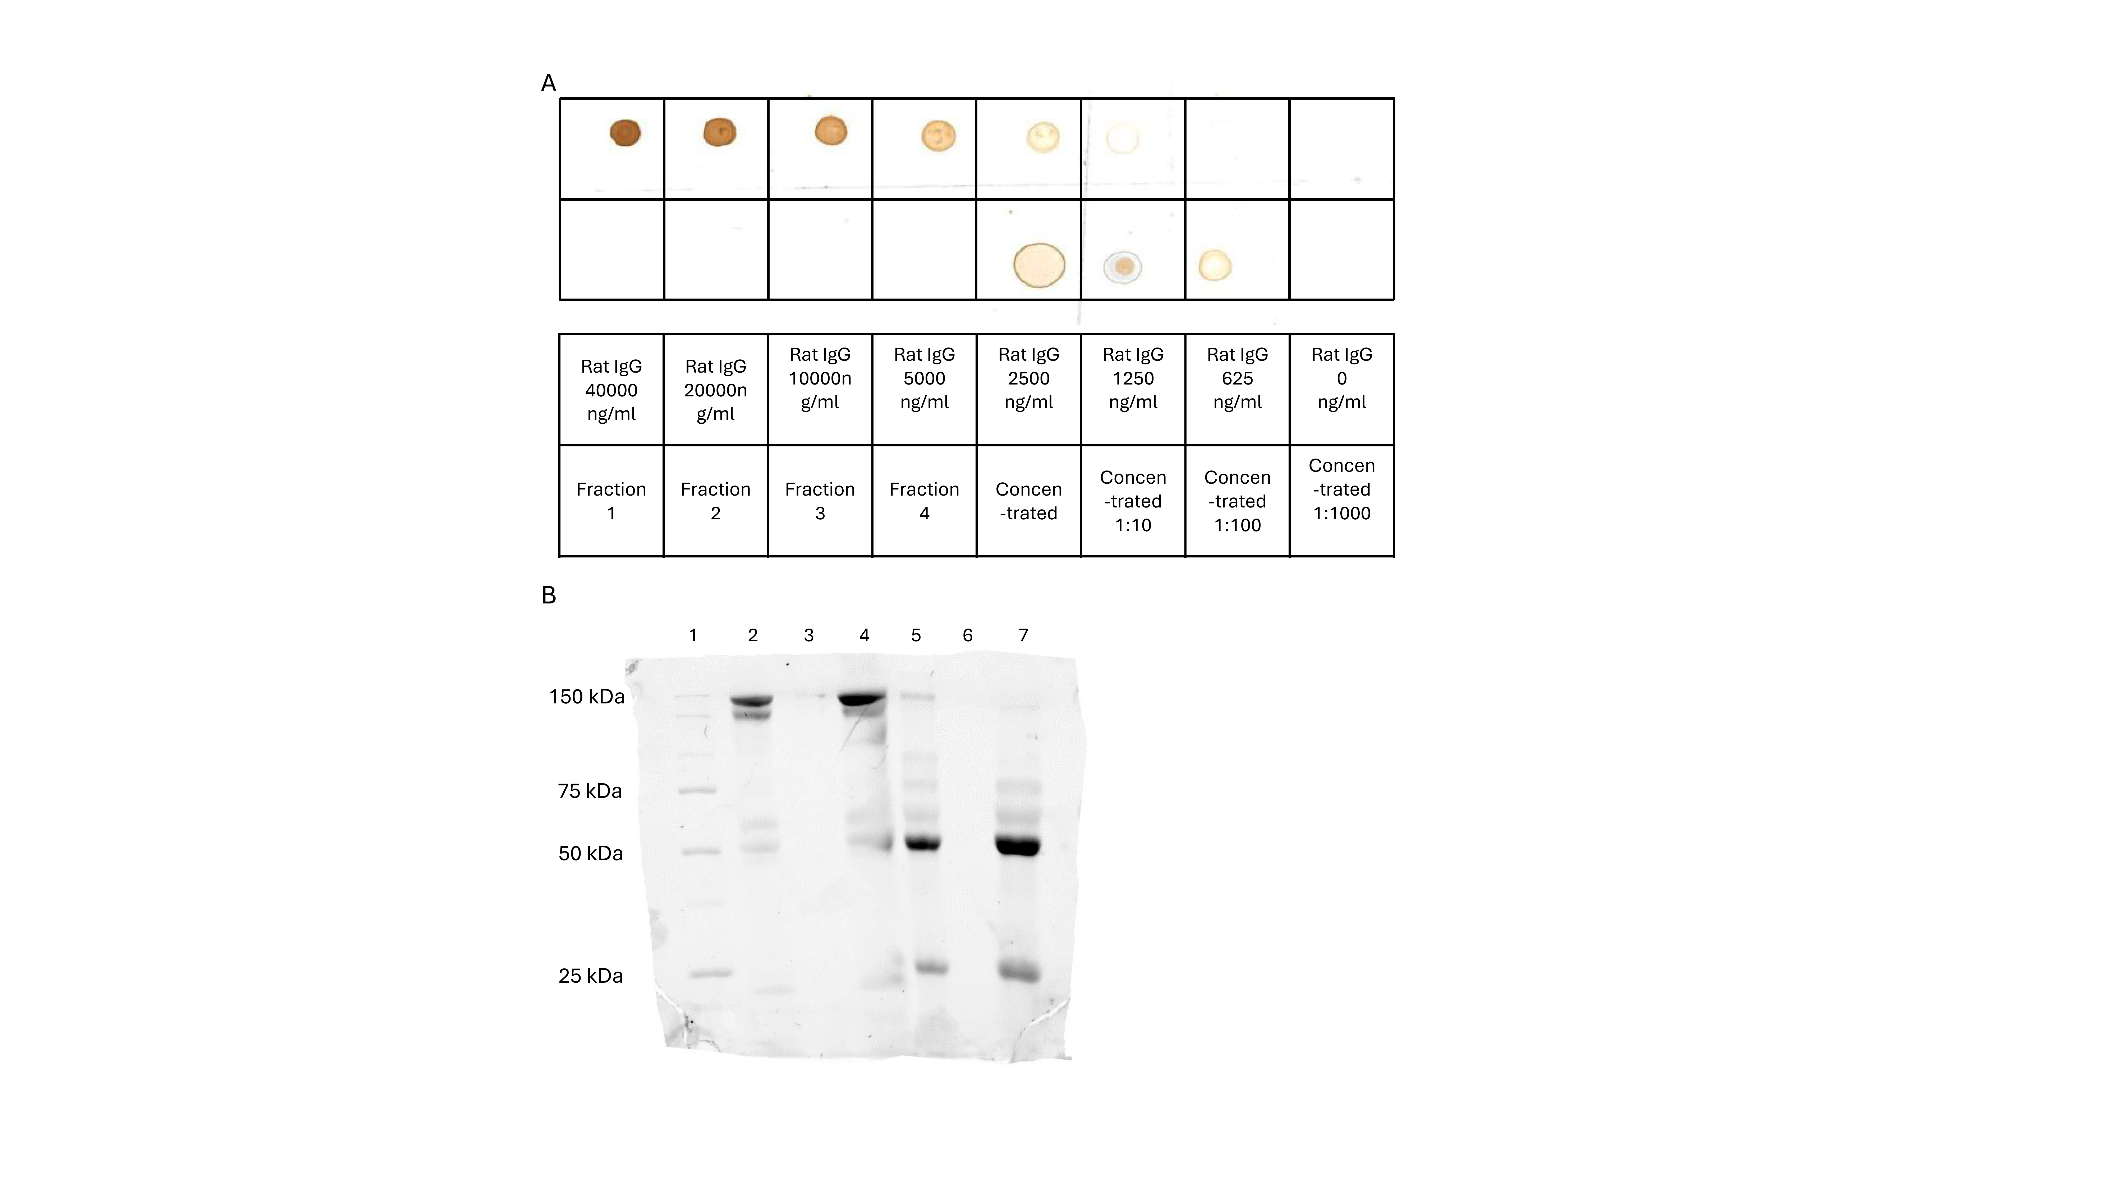
***

**Supplementary Figure 1. MAb35 validation**. A) Presence of mAb35 in supernatant was confirmed using a dotblot. Concentrated mAb35 showed a clear signal while the flow through fractions dialyzer did not. B) Purity of the isolated mAb35 was confirmed with an SDS-page using flow through fractions and unfiltered supernatant as controls. Non-reduced (NR) samples had complete protein interaction rendering whole IgG (lane 2-4). Reduced (R) samples showed fractions of 50 kDa and 25 kDa indicating heavy and light chains respectively (lane 5-7). Loaded samples: 1) ladder, 2) NR mAb35, 3) NR flow through, 4) NR unfiltered supernatant, 5) R mAb35, 6) R flow through, 7) R unfiltered supernatant.

**Supplementary Table 1**. Disease inducing dose determination.

| Rat weight (g) | Injected mAb35 dose (ρmol/100 g BW) | Clinical score 48 hours post immunization |
| --- | --- | --- |
| 219.0 | 53.4 | 2-3 |
| 197.5 | 52.8 | HEP |
| 193.3 | 26.5 | 2 |
| 187.7 | 27.8 | 2 |

| **Description** | | | | | | |
| --- | --- | --- | --- | --- | --- | --- |
| **General impression** | | | | | | |
|  | **0** | | **1** | **2** | **3** | **HEP*** |
| **Posture** | Normal | |  | Hunched |  | Flaccid paralysis |
| **Movement/activity** | Normal | | Slightly reduced activity | Markedly reduced and/or uncoordinated activity  Reluctant to move, tremor Resting neck after some activity | Significant mobility problems: Incapacity to keep the neck straight in resting position, persisting immobility<24h | Flaccid paralysis |
| **Coat/skin condition** | Normal | | Rough  Slightly unkempt | Rough  Lack of grooming  Slight dry skin  Slight pilo-erection | Marked pili-erection |  |
| **Breathing pattern** | Normal | | Rapid/Accelerated breathing (tachypnoea) |  | Audible breathing  Laboured breathing (hyperpnoea) | Laboured breathing (dyspnoea) |
| **Bodyweight loss %** | 0-5% | | >5-10% | >10-15% | >15%-20% | >20% |
| **Hydration** | Normal | | Skin less elastic  (delayed +/-) | Skin tents (delayed +) | Skin tents (delayed ++) | Skin tents (delayed +++)  eyes sunken |
|  | **0** | **1** | | **2** | **3** | **HEP*** |
| **Motor function; Rack grabbing test** | No weakness | Weakness after completing activity | | Weakness and fatigability during activity;  incapable to finish the task | Severe weakness; incapability to start the task |  |
| **Motor function; Hand climbing test** | No weakness | Weakness after completing activity | | Weakness and fatigability during activity;  incapable to finish the task | Severe weakness; incapability to start the task |  |

***Supplementary Table 2.*** *General welfare and disease specific scoring sheet.*

| **Actions to be taken** | **Total score** |
| --- | --- |
| Review frequency of monitoring | 1-5 |
| Consider supplementary fluids/care/analgesia | 2-7 |
| Review progress with biotechnician and consult vet | 2-7 |
| Humane endpoint | 8 and higher |

***humane endpoint implemented, regardless of presence or absence of other clinical signs**
